# Supplementary material for: Bispecific Antibody Inhalation Therapy for Redirecting Stem Cells from the Lungs to Repair Heart Injury
Source: PubMed Central journal article supplement (PMC7788635; doi:10.1002/advs.202002127), 2020-11-19
Supplement: ADVS-8-2002127-s001.pdf [file ADVS-8-2002127-s001.pdf]

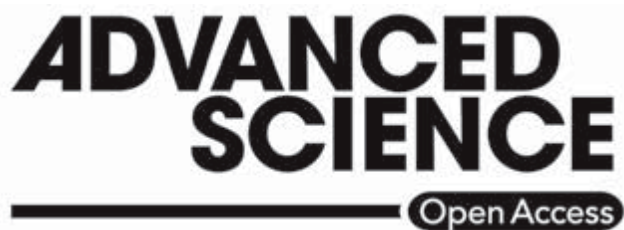

## Supporting Information

for *Adv. Sci.*, DOI: 10.1002/adv.202002127

### **Bispecific antibody inhalation therapy for redirecting stem cells from the lungs to repair heart injury**

Mengrui Liu<sup>1,2</sup>, Halle Lutz<sup>1</sup>, Dashuai Zhu<sup>1,2</sup>, Ke Huang<sup>1</sup>, Zhenhua Li<sup>1,2</sup>, Phuong-Uyen C. Dinh<sup>1,3</sup>, Junqing Gao<sup>4</sup>, Yi Zhang<sup>5</sup>, Ke Cheng<sup>1,2</sup>\*

## Supplementary Materials

### **Bispecific antibody inhalation therapy for redirecting stem cells from the lungs to repair heart injury**

Mengrui Liu<sup>1,2</sup>, Halle Lutz<sup>1</sup>, Dashuai Zhu<sup>1,2</sup>, Ke Huang<sup>1</sup>, Zhenhua Li<sup>1,2</sup>, Phuong-Uyen C. Dinh<sup>1,3</sup>, Junqing Gao<sup>4</sup>, Yi Zhang<sup>5</sup>, Ke Cheng<sup>1,2</sup> \*

<sup>1</sup> Department of Molecular Biomedical Sciences, North Carolina State University, North Carolina, USA.

<sup>2</sup> Joint Department of Biomedical Engineering, University of North Carolina at Chapel Hill and North Carolina State University, USA.

<sup>3</sup> Comparative Medicine Institute, North Carolina State University, North Carolina, USA.

<sup>4</sup> Department of Cardiology, Putuo Hospital, Shanghai University of Traditional Chinese Medicine, Shanghai, China.

<sup>5</sup> Department of Cardiology, Shanghai Tenth People's Hospital, Tongji University School of Medicine, Shanghai, China.

\* Corresponding Author: Ke Cheng, Ph.D., North Carolina State University, 1001 William Moore Dr, Raleigh, NC 27606, Email: [kcheng3@ncsu.edu](mailto:kcheng3@ncsu.edu)

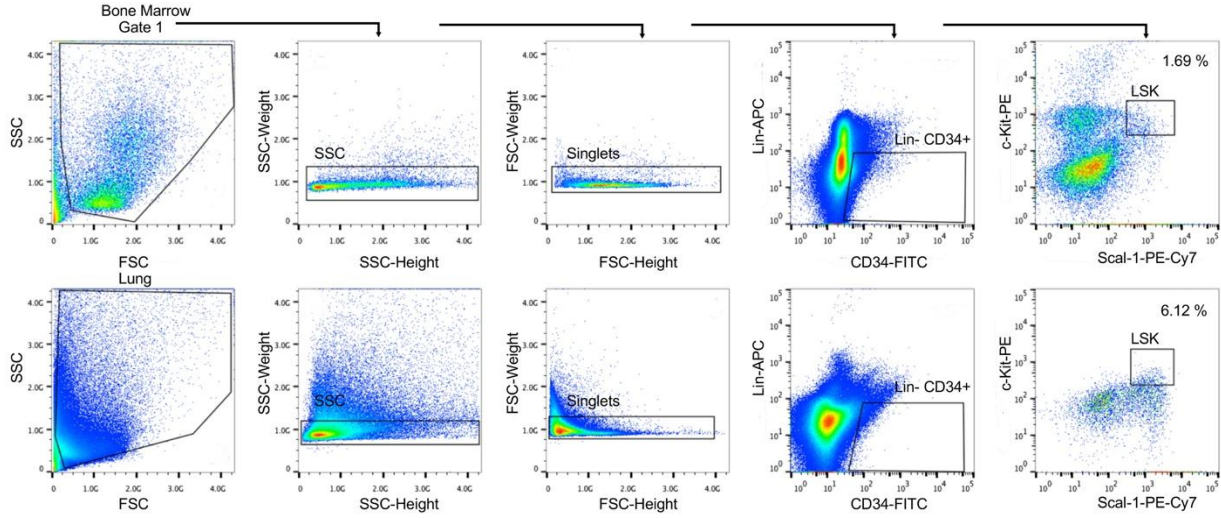

**Figure S1. The lung contains a significant amount of HSCs.** Representative flow cytometry dot plots showing the percentage of HSCs in the bone marrow and in the lungs. HSCs were identified as Lin<sup>-</sup>Sca-1<sup>+</sup>c-Kit<sup>+</sup>CD34<sup>+</sup>.

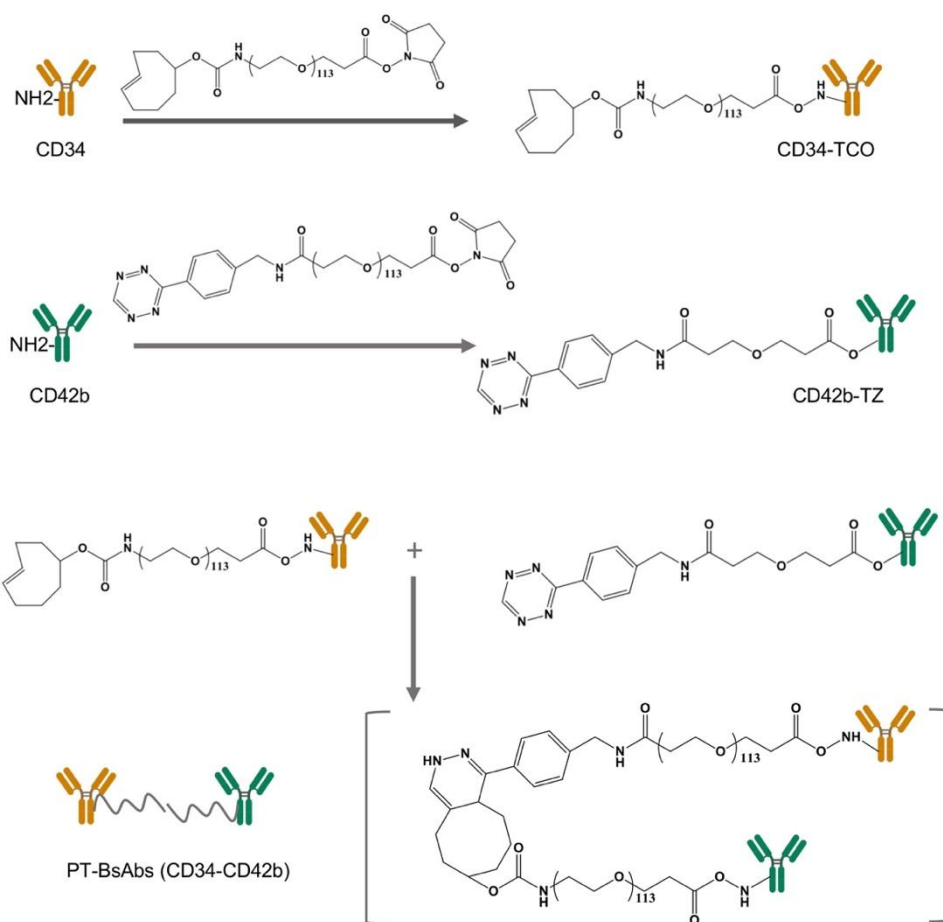

**Figure S2. Synthesis process of CD34-TCO, CD42b-TZ and PT-BsAbs (CD34-CD42b).**

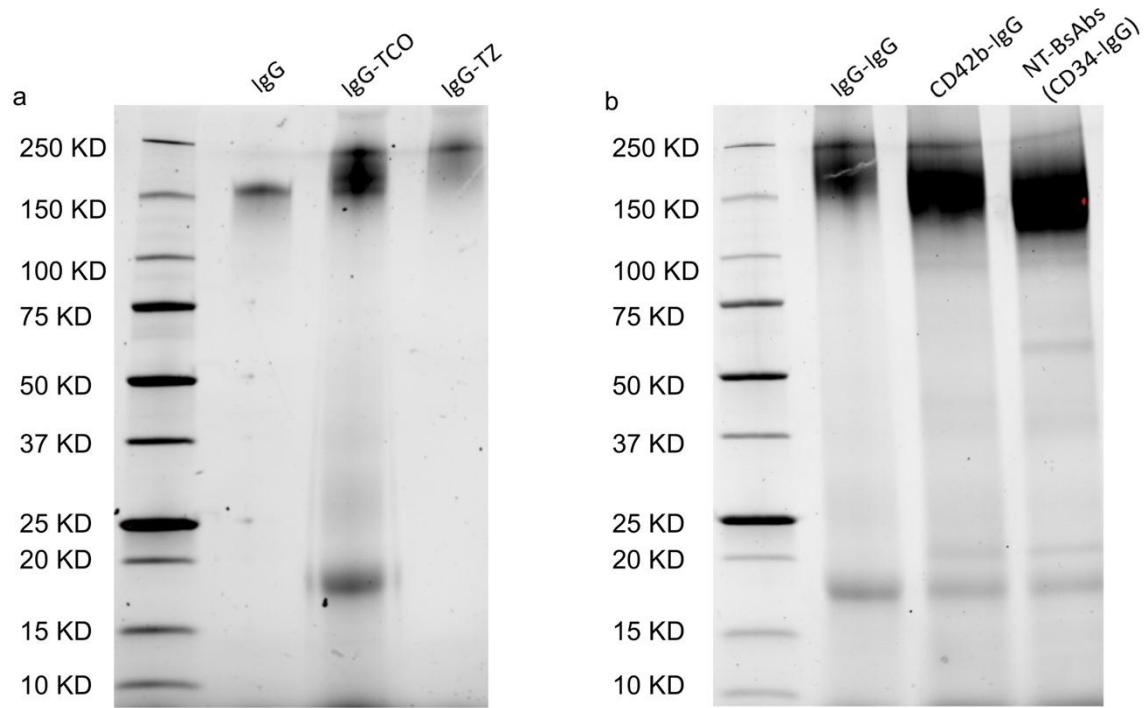

**Figure S3. SDS-PAGE results.** (a) SDS-PAGE of IgG and semi-products (IgG-TCO and IgG-TZ). (b) SDS-PAGE of synthesized IgG-IgG, CD42b-IgG and NT-BsAbs (CD34-IgG).

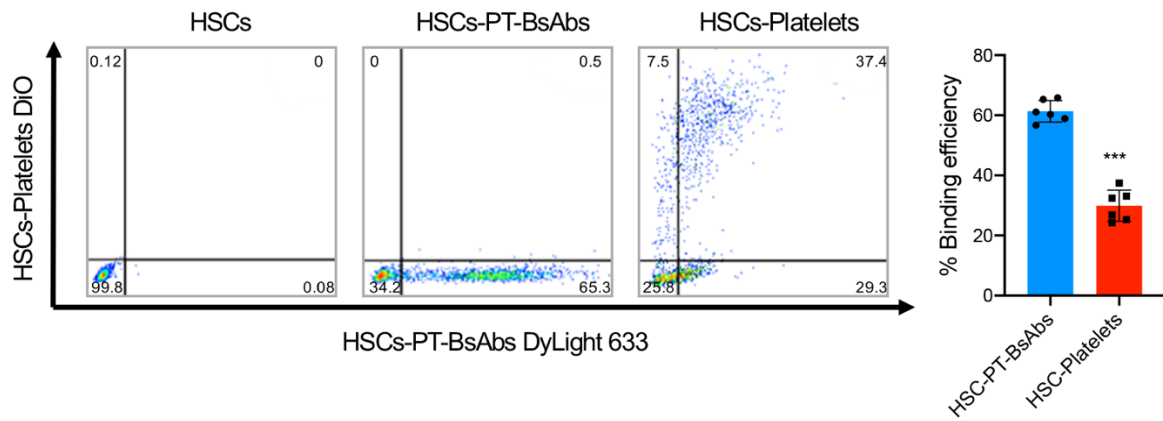

**Figure S4. Representative flow cytometry dot plots and quantitative results.** Plots indicating unlabeled HSCs (left), PT-BsAbs conjugated HSCs (middle), and HSC-Platelet (HSC-PLT) (right) (n=3). PT-BsAbs were pre-labeled with DyLight 633 while platelets were labeled with DiO.

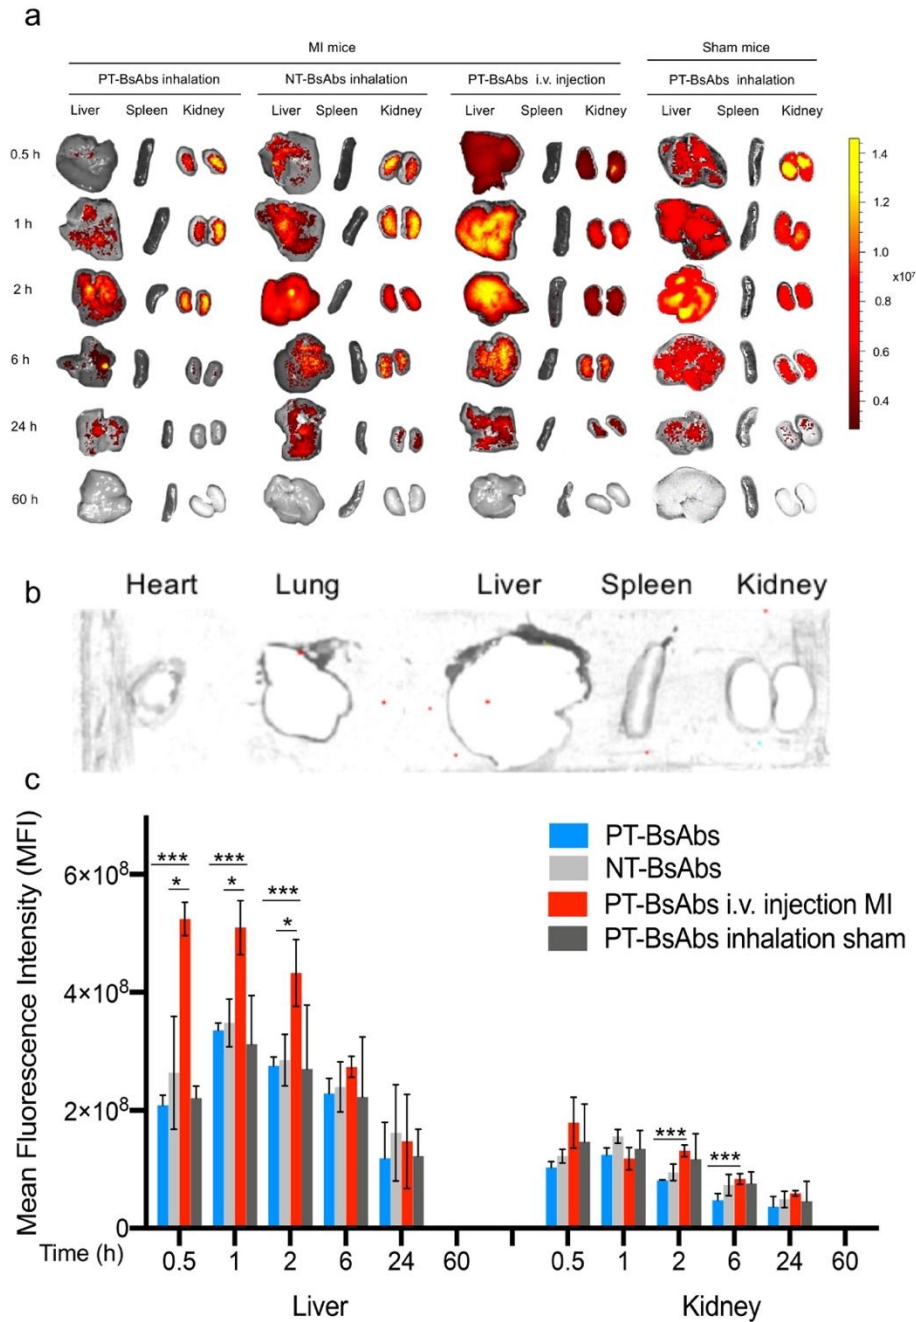

**Figure S5. Biodistribution of DyLight 633-labeled BsAbs in liver, spleen and kidney.** (a) *Ex vivo* imaging to evaluate the distribution of PT-BsAbs or NT-BsAbs after inhalation, PT-BsAbs after i.v. injection in MI mice, and PT-BsAbs after inhalation in sham mice at different time points. (b) *Ex vivo* imaging of main tissues without fluorescence labeling. (c) Time-course quantification of fluorescence signals from liver and kidney of mice treated with PT-BsAbs via different administrations and inhalant NT-BsAbs. N=3.

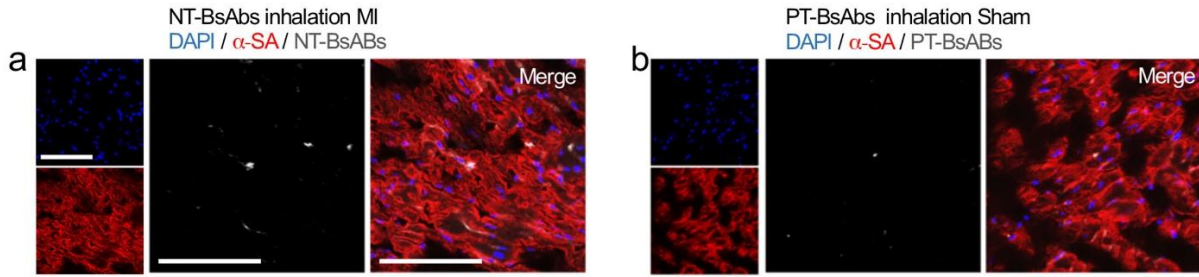

**Figure S6. Accumulation of NT-BsAbs or PT-BsAbs in the heart 6 h after treatment.** (a) Representative confocal images revealing the NT-BsAb retention in the MI heart 6 h after inhalation administration. (b) Representative confocal images revealing the PT-BsAb retention in the heart of sham mice 6 h after inhalation administration. Cardiomyocytes were stained with alpha sarcomeric actin ( $\alpha$ -SA) (red). Nuclei were stained with DAPI (blue). Scale bar, 200  $\mu$ m. NT-BsAbs or PT-BsAbs were pre-labeled with DyLight 633 (gray).



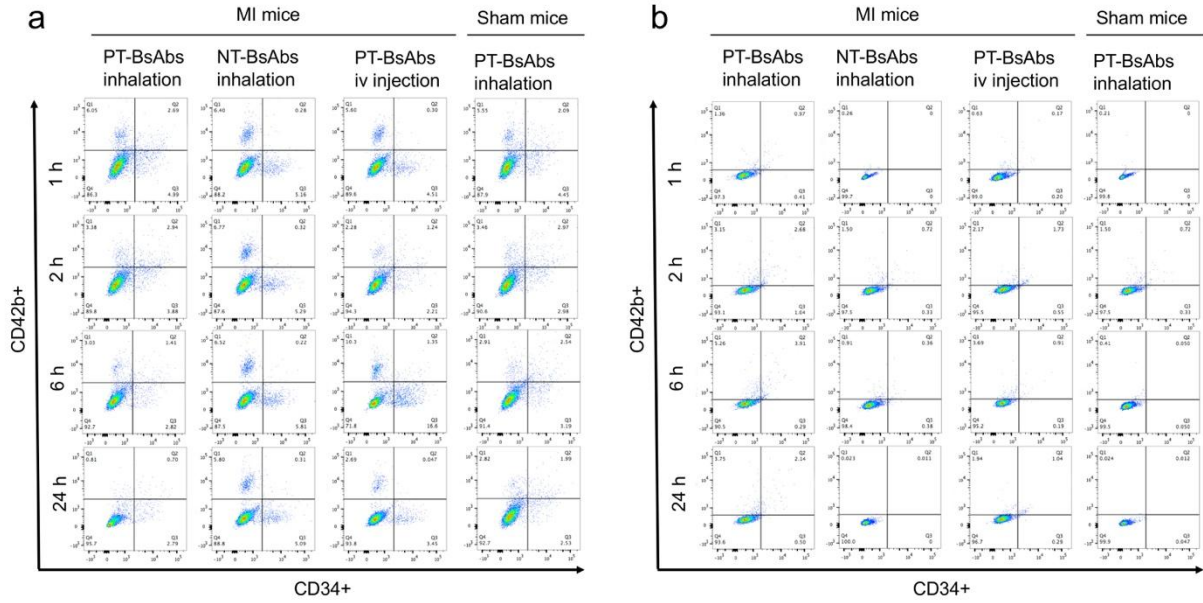

**Figure S7. Flow cytometry dot plots.** Flow cytometry results of platelet-conjugated HSCs ( $CD34^+CD42b^+$ ) in the lungs (a) and the heart (b). HSCs and platelets were individually stained with anti-CD34 antibodies and anti-CD42b antibodies, while PT-BsAbs and NT-BsAbs were pre-labeled with DyLight 633.

DAPI / Phalloidin / CD34 / PT-BsAbs

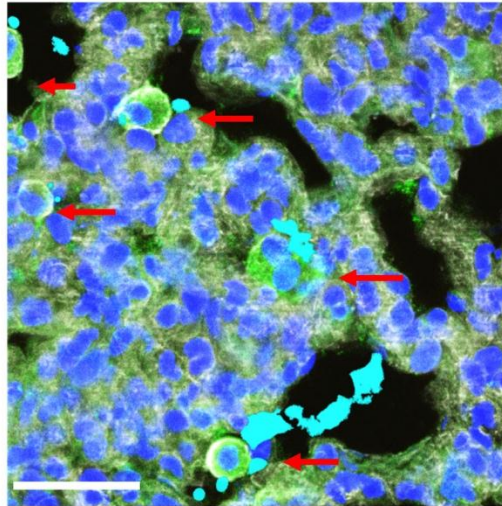

**Figure S8. Distribution of HSCs and PT-BsAbs in the lung.** Representative confocal images showing conjugation of inhaled PT-BsAbs with HSCs in the lungs of MI mice. Lung cells were stained with anti-Phalloidin antibodies (gray), HSCs were stained with anti-CD34 antibodies (green), nuclei were stained with DAPI (blue). PT-BsAbs were pre-labeled with DyLight 633 (cyan). Scale bar, 25  $\mu$ m. Red arrowhead indicated HSCs.

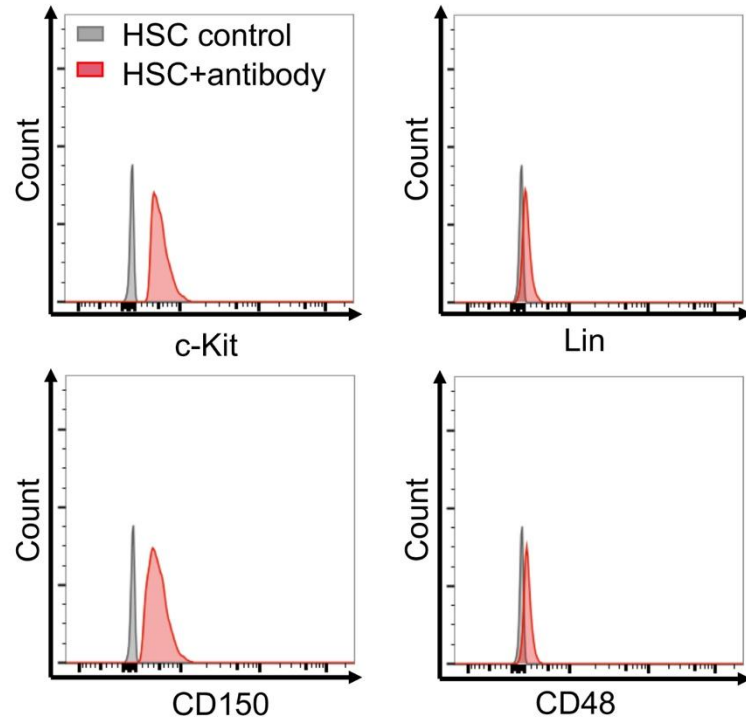

**Figure S9. Flow cytometry characterization of CD34<sup>+</sup>HSCs in the heart.**

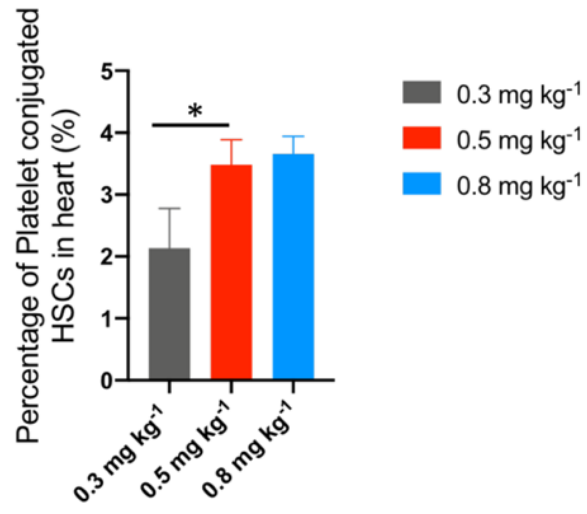

**Fig. S10.** Flow cytometry quantification results of platelet-conjugated HSCs (CD34<sup>+</sup>CD42b<sup>+</sup>) in the heart 6 h post inhalation of various doses of PT-BsAbs.

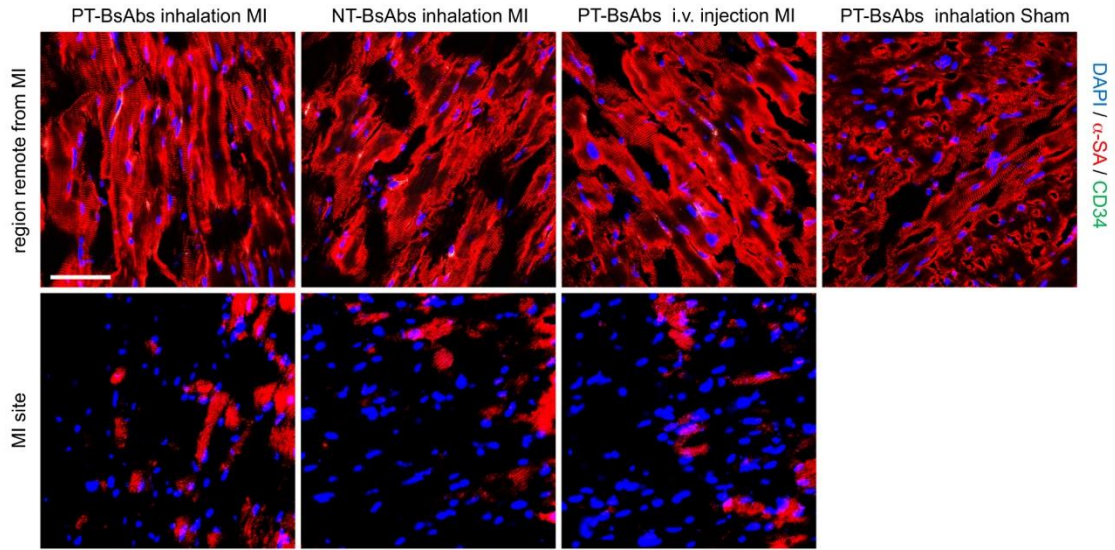

**Figure S11. Accumulation of HSCs in healthy and MI areas post-MI.** Cardiomyocytes were stained with alpha sarcomeric actin ( $\alpha$ -SA) (red). HSCs were stained with CD34 antibody (green). Nuclei were stained with DAPI (blue). Scale bar, 50  $\mu$ m.

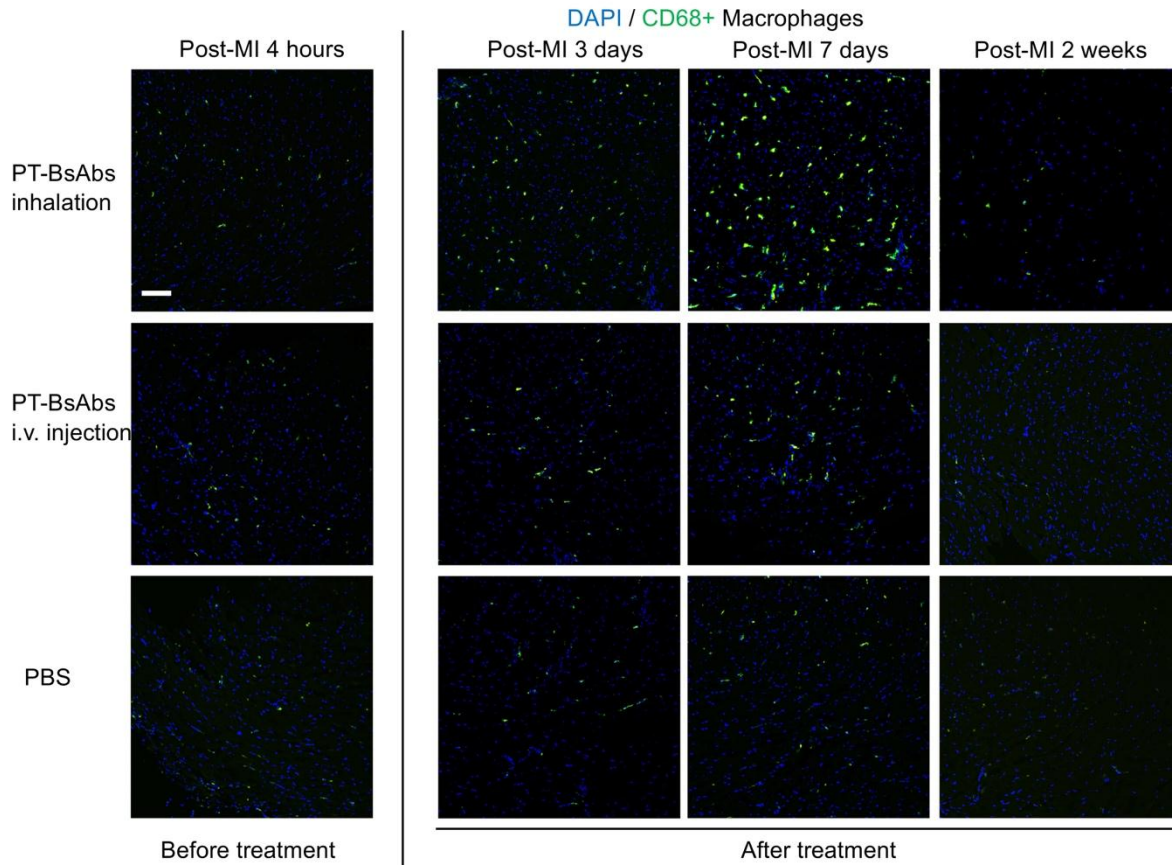

**Figure S12. PT-BsAb inhalation increases overall macrophage numbers in the heart.** Accumulation of CD68<sup>+</sup> macrophages 4 h (before treatments), 3 days, 7 days and 14 days post MI (with treatments). Scale bar, 100  $\mu$ m.

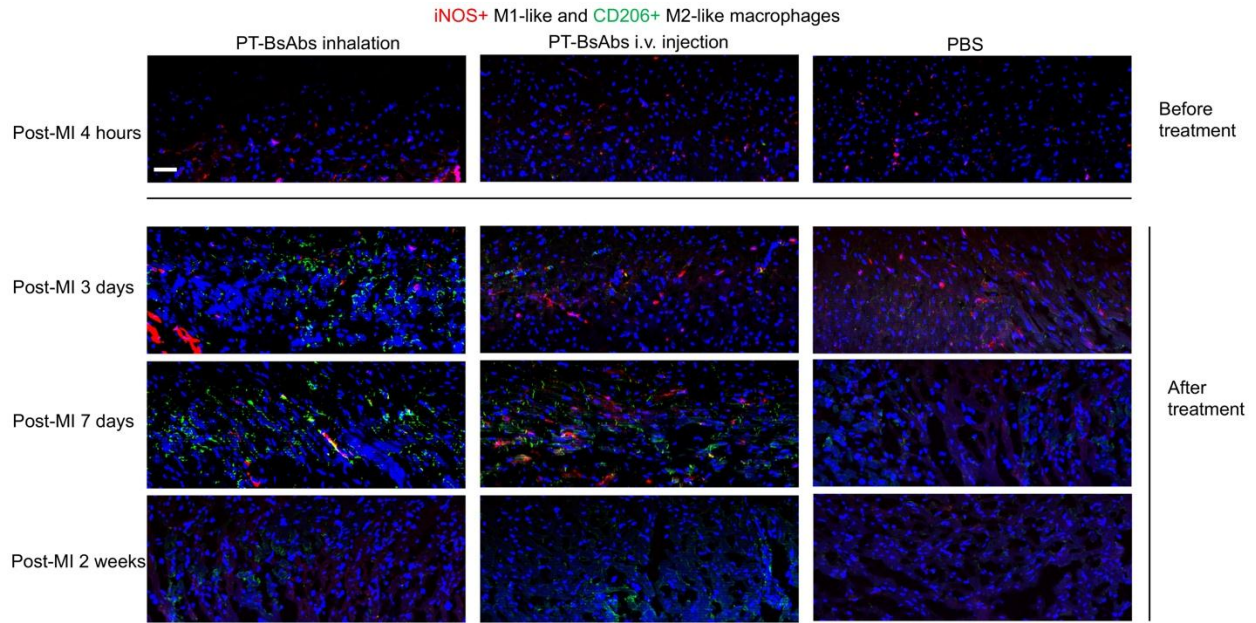

**Figure S13. PT-BsAb inhalation increases CD206<sup>+</sup> M2-like macrophage percentage and reduces iNOS<sup>+</sup> M1-like macrophage percentage in the heart.** Accumulation of CD206<sup>+</sup> macrophages and iNOS<sup>+</sup> macrophages at 4 h (before treatments), 3 days, 7 days and 14 days post MI (with treatments). Scale bar, 50  $\mu$ m.

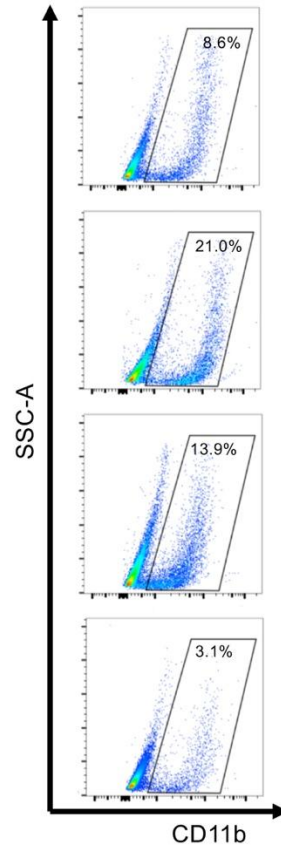

**Figure S14. Flow cytometry dot plots of the percentage of CD11b<sup>+</sup> cells 4 h post MI (before treatments) or at 3 days, 7 days and 14 days after PT-BsAb inhalation administration.**



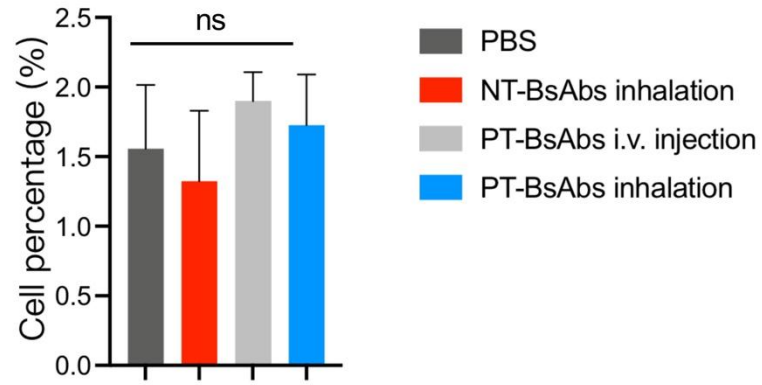

**Figure S15. Flow cytometry quantitation of neutrophil accumulation in the heart 7 days post MI in various groups. N=3.**

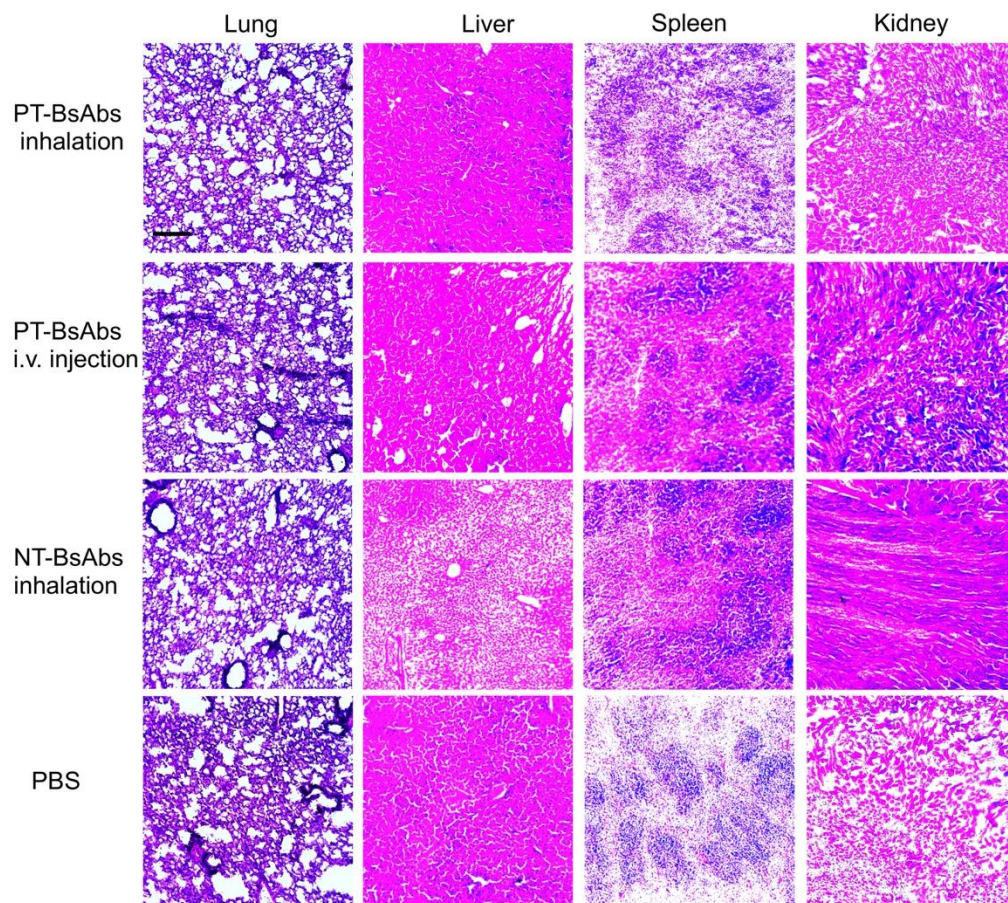

**Figure S16. H&E staining of main tissues except heart in mice 21 days after various treatments in MI mice.**  
Scale bar, 200  $\mu$ m.

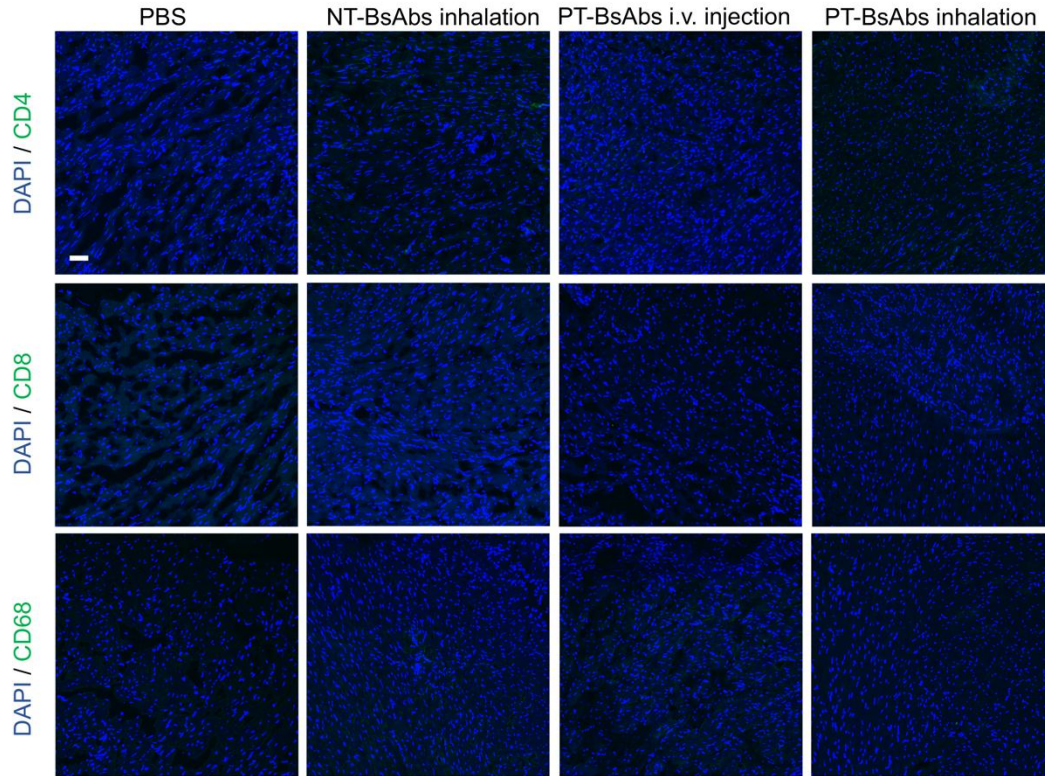

**Figure S17. Presence of CD4<sup>+</sup> and CD8<sup>+</sup> T cells, and CD68<sup>+</sup> macrophages in the heart 21 days after various treatments.** Scale bar, 60  $\mu$ m.

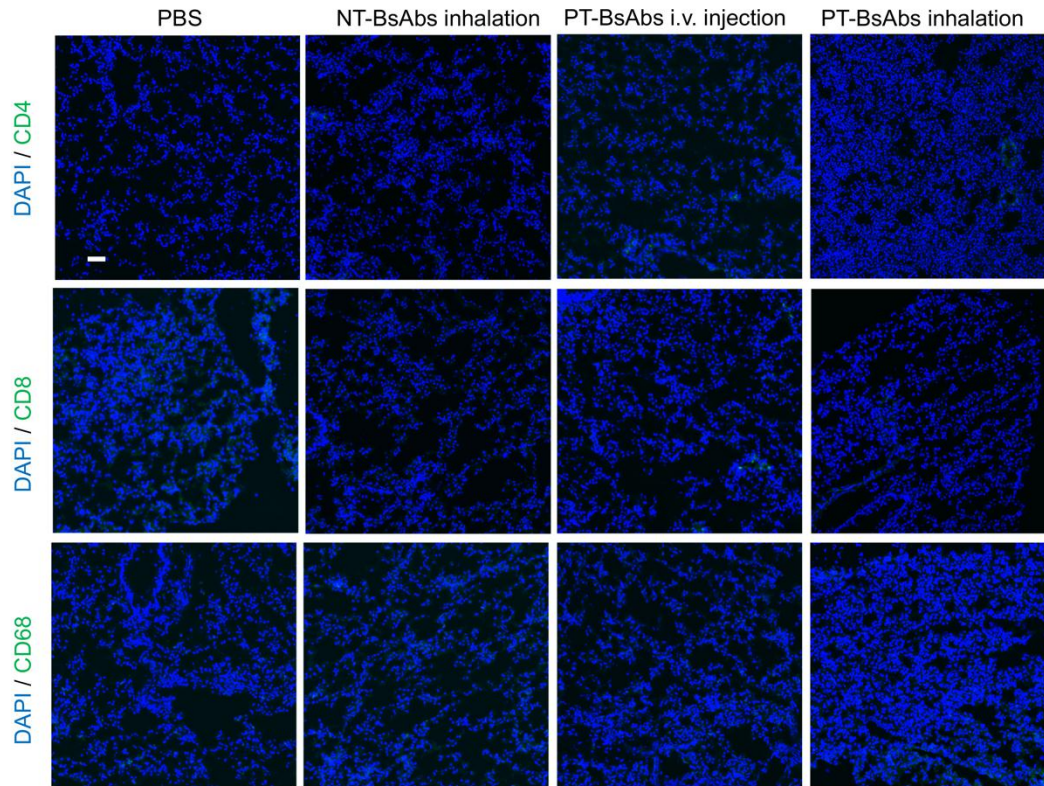

**Figure S18.** Presence of CD4<sup>+</sup> and CD8<sup>+</sup> T cells, and CD68<sup>+</sup> macrophages in the lung 21 days after various treatments. Scale bar, 60  $\mu$ m.

**Table 1. Antibodies used in the study.**

| <b>Antibodies</b>                         | <b>Company</b>           | <b>Catalog #</b> | <b>Application</b> |
|-------------------------------------------|--------------------------|------------------|--------------------|
| Anti-Rat CD34                             | BD                       | BDB553731        | BsAbs synthesis/IF |
| Anti-Mouse CD42b                          | Santa Cruz Biotechnology | Sc-59052         | BsAbs synthesis/IF |
| Anti-Mouse IgG                            | Santa Cruz Biotechnology | Sc-2025          | BsAbs synthesis    |
| FITC Goat Anti-Rat CD34 antibody          | eBioscience              | 11-0341-82       | Cell experiment    |
| FITC Goat Anti-Mouse CD42b antibody       | eBioscience              | 11-0429-42       | Cell experiment    |
| Alexa Fluor® 594 Anti-Phalloidin          | Abcam                    | ab176757         | IF                 |
| Goat Anti-Rabbit vWF                      | Abcam                    | ab111713         | IF                 |
| Goat Anti-Rabbit $\alpha$ -SA             | Abcam                    | Ab72592          | IF                 |
| Goat Anti-Rabbit ki67                     | Abcam                    | Ab15580          | IF                 |
| Goat Anti-Rabbit Caspase-3                | Abcam                    | Ab13847          | IF                 |
| Goat Anti-Rabbit Cleaved PARP             | Abcam                    | Ab32064          | IF                 |
| Goat Anti-Rabbit $\alpha$ -SMA            | Abcam                    | Ab5694           | IF                 |
| Goat Anti-Rabbit CD68                     | Abcam                    | ab125212         | IF                 |
| Goat Anti-Rabbit iNOS                     | Abcam                    | Ab15323          | IF                 |
| Goat Anti-Mouse CD206                     | Abcam                    | Ab64693          | IF                 |
| Goat Anti-Rabbit CD8                      | Abcam                    | Ab217344         | IF                 |
| Goat Anti-Rabbit CD4                      | Abcam                    | Ab237722         | IF                 |
| FITC Anti-Mouse F4/80                     | eBioscience              | 11-4801-82       | Flow Cytometry     |
| PE Anti-Mouse CD11b                       | eBioscience              | 12-0112-82       | Flow Cytometry     |
| PE/Cy7 Anti-Mouse CCR2                    | BioLegend                | 150611           | Flow Cytometry     |
| Alexa Fluor® 488 Goat Anti-Rabbit IgG H&L | Abcam                    | Ab150077         | IF                 |
| Alexa Fluor® 647 Goat Anti-Mouse IgG H&L  | Abcam                    | Ab150115         | IF                 |
| Alexa Fluor® 647 Goat Anti-Rabbit IgG H&L | Abcam                    | Ab150083         | IF                 |
| Alexa Fluor® 488 Goat Anti-Mouse IgG H&L  | Abcam                    | Ab150113         | IF                 |
